# Supplementary material for: Shining a light on the hidden structure of gelatin methacryloyl bioinks using small-angle X-ray scattering (SAXS)
Source: Royal Society of Chemistry journal article supplement (doi:10.1039/d1qm01010g), 2021-01-01
Supplement: d1qm01010g1.pdf [file d1qm01010g1.pdf]

## Supplementary Figures

### Shining a Light on the Hidden Structure of Gelatin Methacryloyl Bioinks Using Small-Angle X-ray Scattering (SAXS)

Mitchell Boyd-Moss<sup>#</sup>, Kate Firipis<sup>#</sup>, Cathal D. O’Connell, Aaqil Rifai, Anita Quigley, Gareth Boer, Benjamin M. Long, David R. Nisbet\*, Richard J. Williams\*

Figure S1. Correlation Heatmap with Values

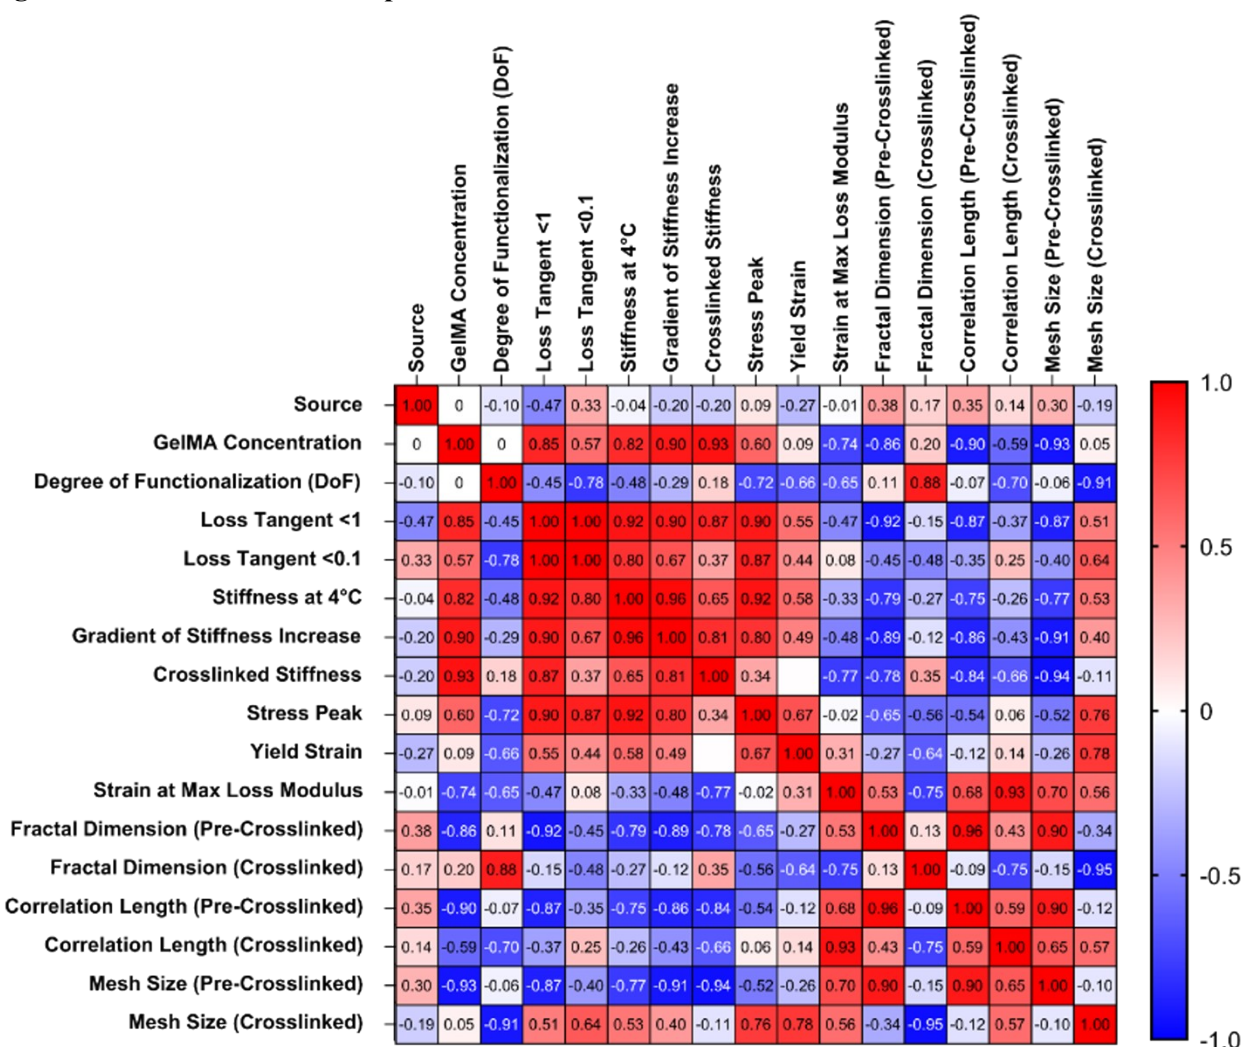

Heatmap showing Pearson r values as an indication of correlations between investigated variables as calculated through Pearson correlation test.

**Figure S2. SAXS Acquired Scattering Profiles of GelMA Hydrogels**

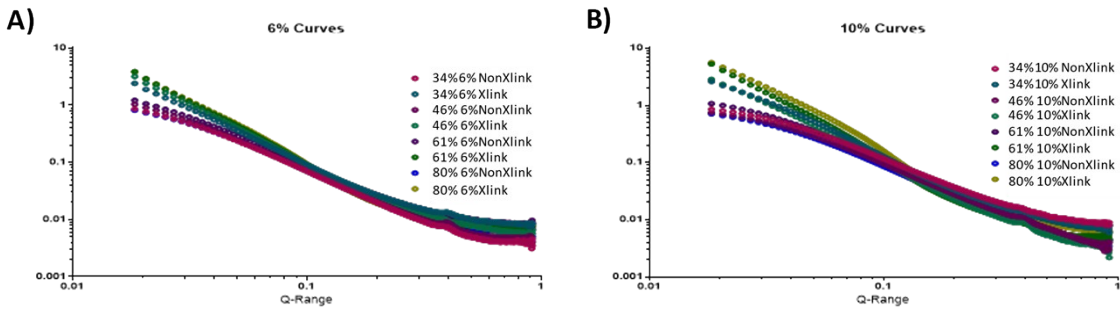

A) 6% GelMA Hydrogels, and B) 10% GelMA hydrogels.

**Figure S3. Fitting Various Models to Scattering Profiles of GelMA Hydrogels**

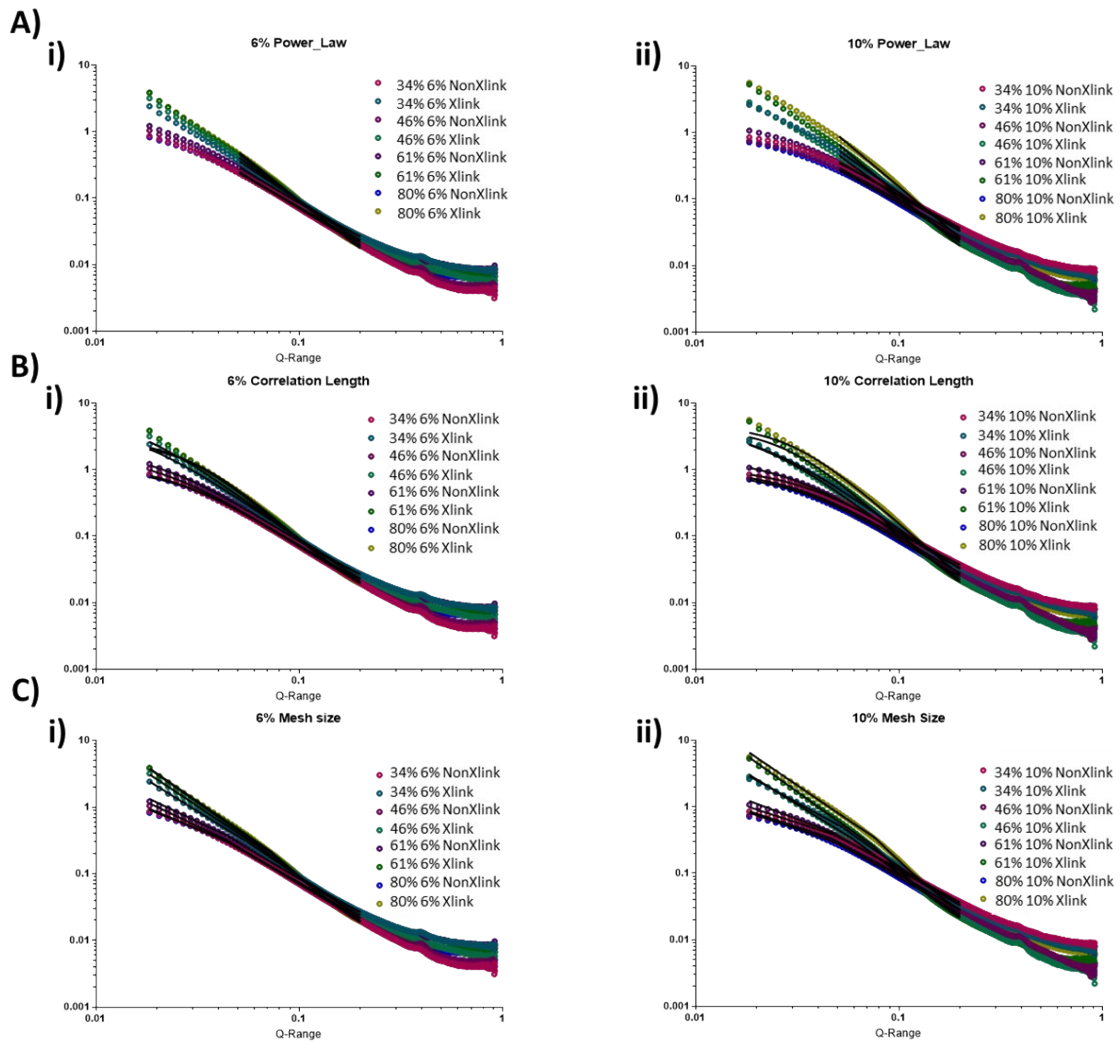

A) Fitting of power-law model (mass fractal dimension) in i) 6% GelMA and ii) 10%. B) Fitting for correlation length in i) 6% GelMA and ii) 10% GelMA. C) Fitting for two-power-law model (for calculation of mesh size) in i) 6% GelMA and ii) 10% GelMA. (Black lines indicate fit)

Figure S4. Nanostructured and Viscoelastic Properties of Pre-Crosslinked GelMA Hydrogels

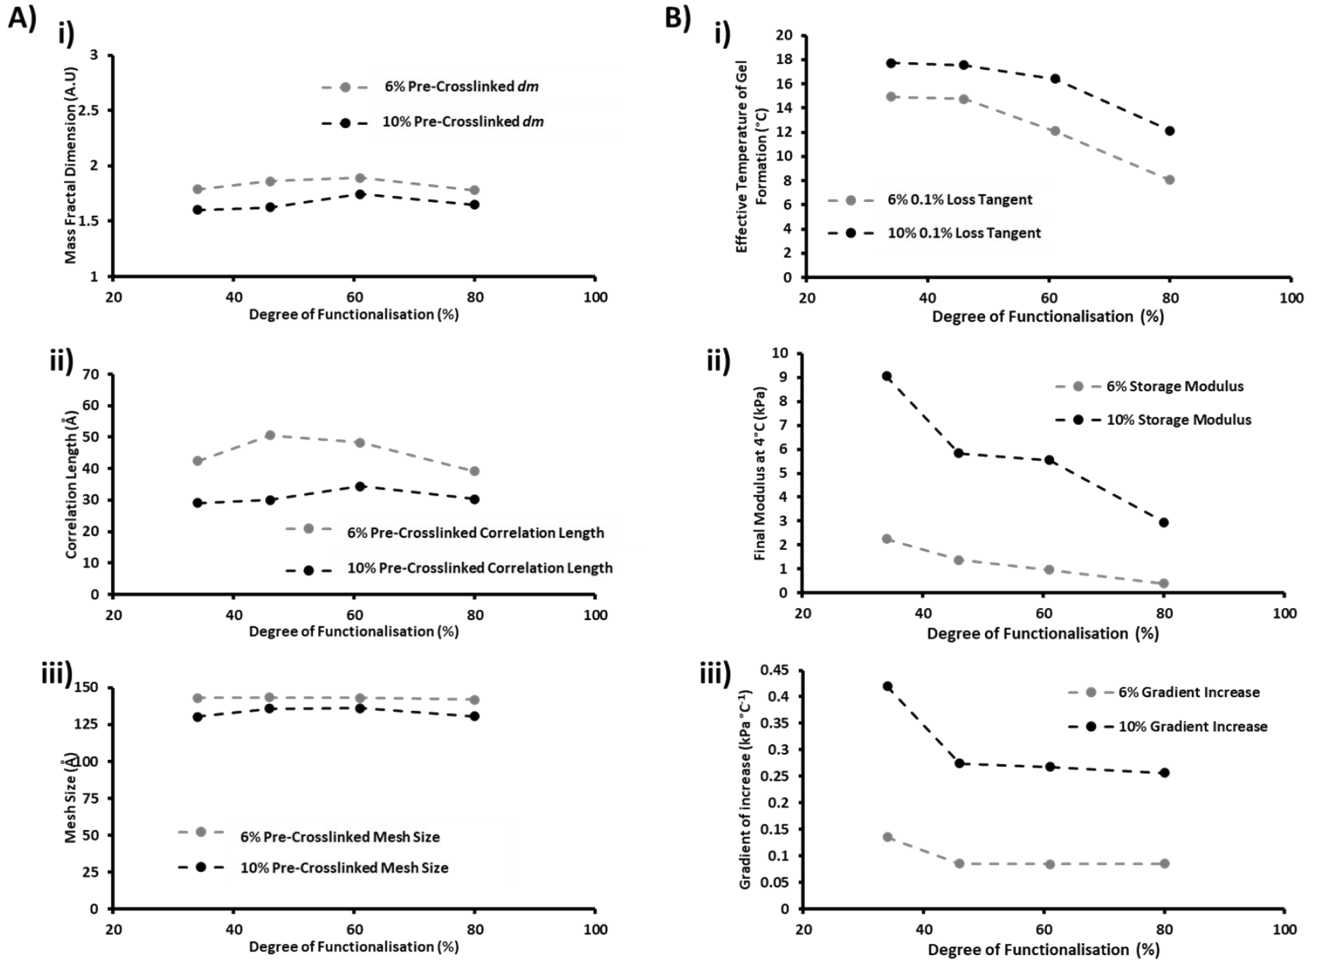

A) Nanostructured properties as determined through SAXs regarding i) mass fractal dimension, ii) correlation length, and iii) mesh size. B) Thermo-dependent viscoelastic properties of pre-crosslinked GelMA, including i) effective temperature of gel formation, ii) storage modulus at 4°C, and iii) gradient of storage modulus increase.

Figure S5. Viscoelastic Properties of GelMA Hydrogels at Different DoF and Concentration

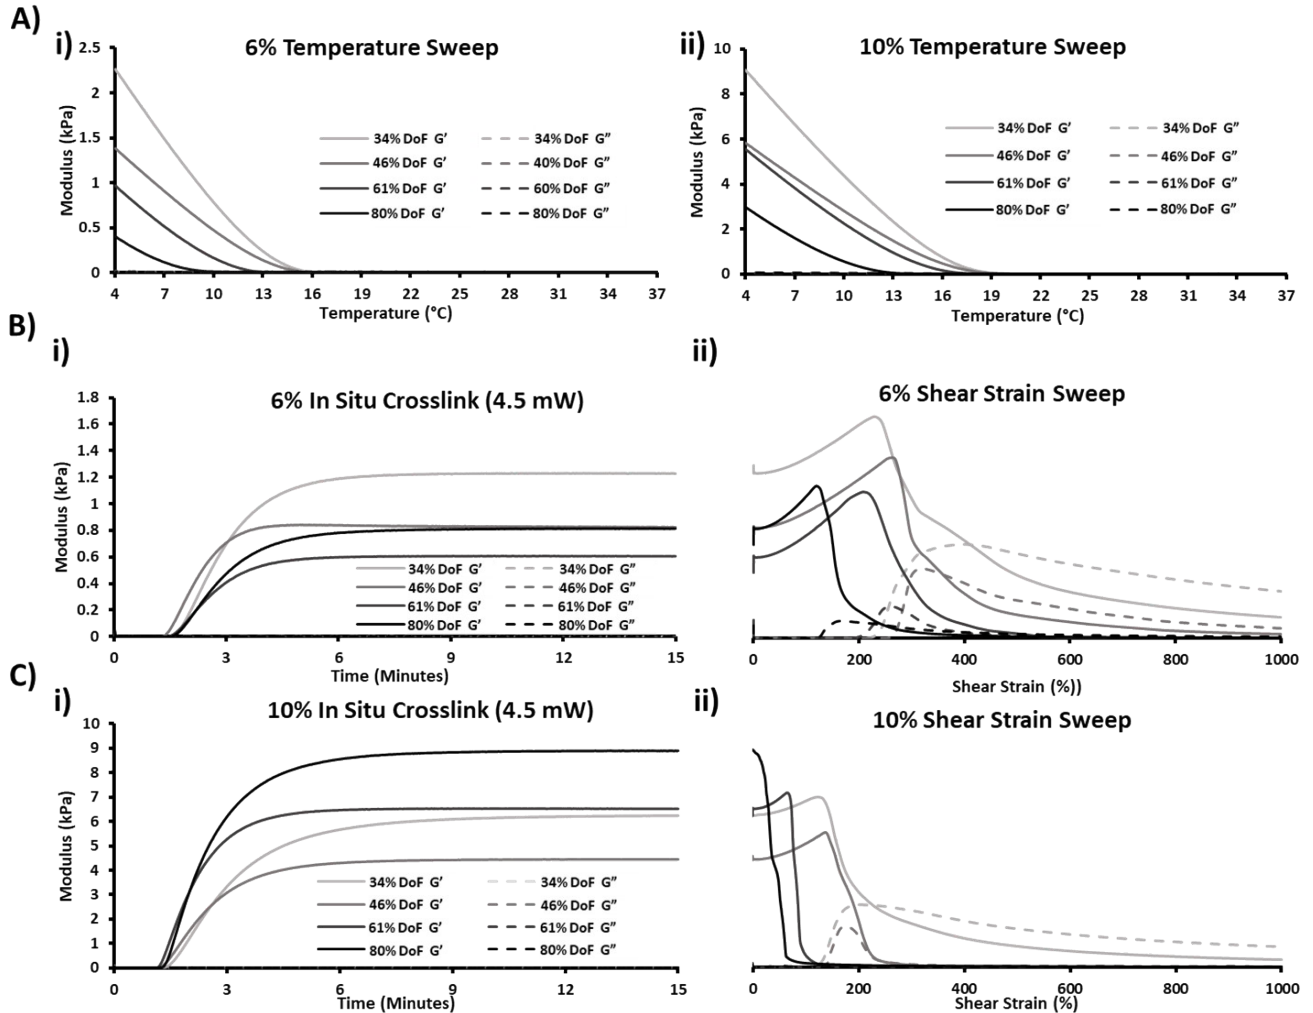

A)  $G'$  and  $G''$  response to cooling in i) 6% GelMA and ii) 10% GelMA pre-crosslinked samples. B)  $G'$  and  $G''$  response to i) crosslinking in 6% GelMA samples and ii) shear-strain in 6% crosslinked GelMA samples. C)  $G'$  and  $G''$  response to i) crosslinking in 10% GelMA samples and ii) shear-strain in 10% crosslinked GelMA samples.

**Figure S6. Viscoelastic Properties of GelMA with Differing DoFs**

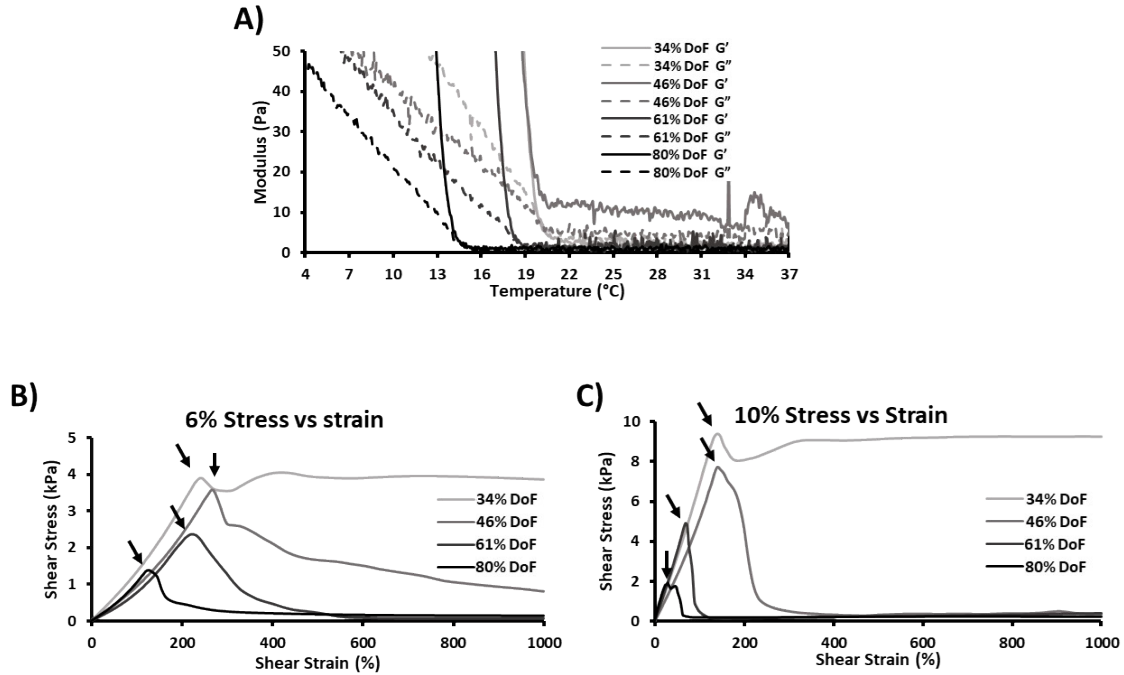

A)  $G'$  and  $G''$  response to temperature change showing lack of traditional fluidic state in some DoF samples. B) Complex stress response to strain in 6% GelMA samples showing effective yield point (arrows). C) Complex stress response to strain in 10% GelMA samples showing effective yield point (arrows).

Figure S7. Nanostructured and Viscoelastic Properties of Crosslinked GelMA

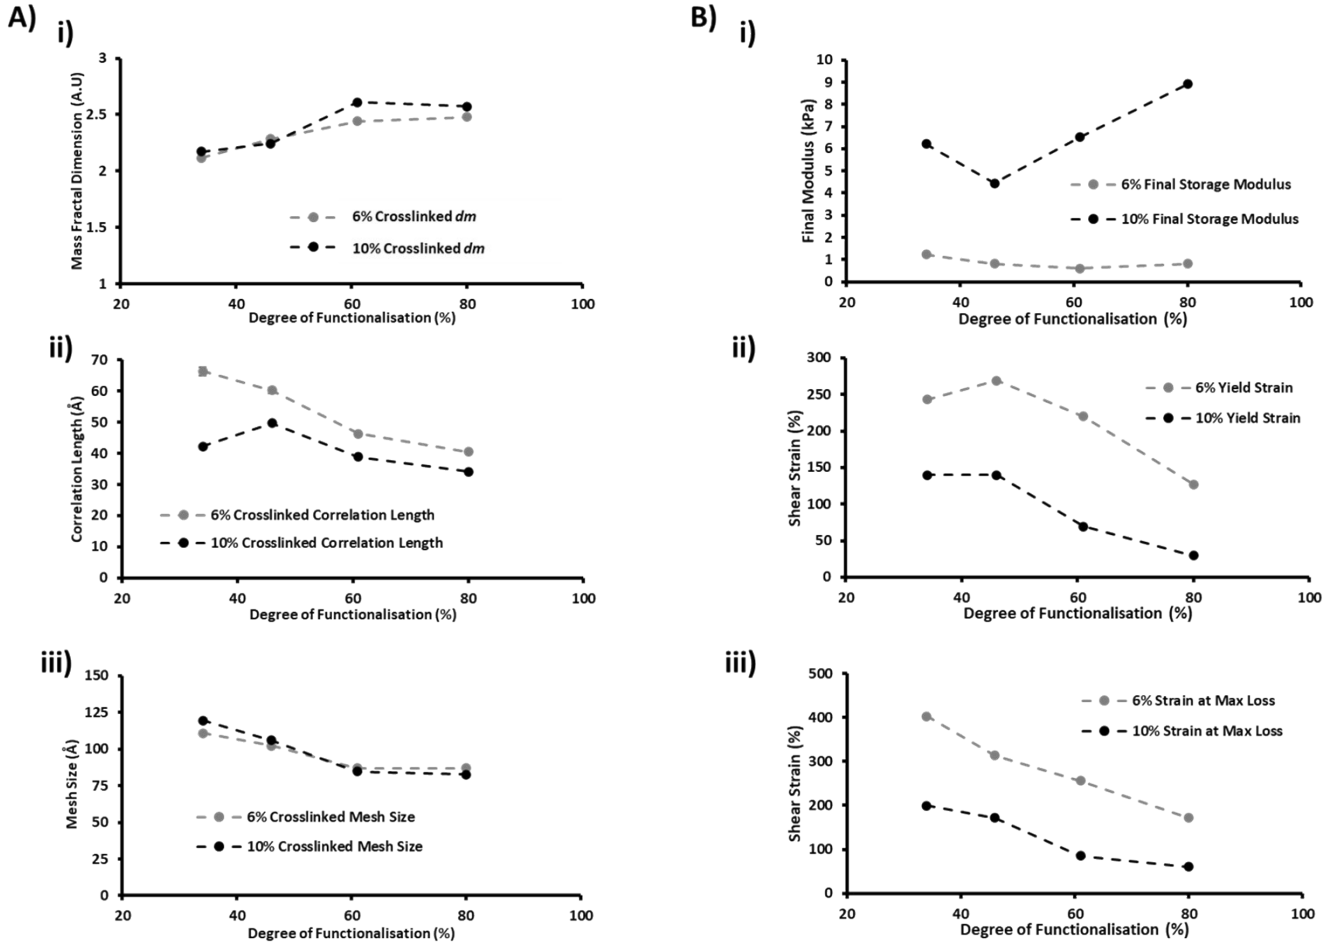

A) Nanostructured properties as determined through SAXS regarding i) mass fractal dimension, ii) correlation length, and iii) mesh size. B) Crosslinked viscoelastic properties including final modulus, yield strain, and strain at max loss modulus.

**Table S1. Comparison of Loss Tangent < 1 and Loss Tangent < 0.1 in GelMA Hydrogels**

**A)**

| <b>DoF</b> | <b>Loss tangent &lt; 1</b> | <b>Loss tangent &lt; 0.1</b> |
|------------|----------------------------|------------------------------|
| 34         | 16.41666667                | 14.92667                     |
| 46         | 16.41333333                | 14.76                        |
| 61         | 13.68333333                | 12.11333                     |
| 80         | N/A                        | 8.066667                     |

6% wt. vol.<sup>-1</sup>

**B)**

| <b>DoF</b> | <b>Loss tangent &lt; 1</b> | <b>Loss tangent &lt; 0.1</b> |
|------------|----------------------------|------------------------------|
| 34         | 19.96333333                | 17.73333                     |
| 46         | N/A                        | 17.56667                     |
| 61         | 18.39666667                | 16.41333                     |
| 80         | N/A                        | 12.12                        |

10% wt. vol.<sup>-1</sup>

A) Comparison of loss tangent values in 6% (w/v) GelMA samples. B) Comparison of loss tangent in 10% (w/v) GelMA samples.

**Table S2. Molecular Weight and Number of 34% DoF and 80% DoF GelMA Samples**

**C)**

|                              | <b>34% DoF</b> | <b>80% DoF</b> |
|------------------------------|----------------|----------------|
| <b>Molecular Weight (Da)</b> | 107,464        | 62,688         |
| <b>Molecular Number</b>      | 39,171         | 19,666         |
| <b>PDI (MW/MN)</b>           | 2.743          | 3.188          |

**Table  
Values  
in**

| Source | GelMA<br>conc. | DoF | Loss Tan<br><1 | Loss Tan<br><0.1 | Stiffness<br>at 4°C | Grad. of<br>Stiffness<br>Increase | Crosslinked<br>Stiffness | Stress<br>Peak | Yield<br>Strain | Strain at<br>Max Loss |
|--------|----------------|-----|----------------|------------------|---------------------|-----------------------------------|--------------------------|----------------|-----------------|-----------------------|
| 1      | 6              | 34  | 16.41667       | 14.92667         | 2264.367            | 135.5769                          | 1230.267                 | 3911.2         | 243             | 403                   |
| 2      | 6              | 46  | 16.41333       | 14.76            | 1376.767            | 85.8837                           | 823.1667                 | 3574.333       | 269             | 313                   |
| 2      | 6              | 61  | 13.68333       | 12.11333         | 964.9867            | 84.71998                          | 603.4867                 | 2358.067       | 220             | 256                   |
| 1      | 6              | 80  | N/A            | 8.066667         | 400.6167            | 85.83634                          | 815.4967                 | 1402.233       | 127             | 171                   |
| 1      | 10             | 34  | 19.96333       | 17.73333         | 9055.8              | 419.9832                          | 6221.7                   | 9369.967       | 778             | 199                   |
| 2      | 10             | 46  | N/A            | 17.56667         | 5838.033            | 274.4133                          | 4437.533                 | 7713.7         | 140             | 171                   |
| 2      | 10             | 61  | 18.39667       | 16.41333         | 5545.067            | 267.8109                          | 6515.467                 | 4919.633       | 69.5            | 84.96667              |
| 1      | 10             | 80  | N/A            | 12.12            | 2962.033            | 256.7342                          | 8904.9                   | 1939.51        | 29.7            | 59.93333              |

**S3A –  
used**

**Correlation Study**

**Table S3B – Values used in Correlation Study (Continued)**



| <b>Frac. Dimension (Pre-Crosslinked)</b> | <b>SD</b> | <b>Frac. Dimension (Crosslinked)</b> | <b>SD</b> | <b>Correlation Length (Pre-Crosslinked)</b> | <b>SD</b> | <b>Correlation Length (Crosslinked)</b> | <b>SD</b> | <b>Mesh Size (Pre-Crosslinked)</b> | <b>SD</b> | <b>Mesh Size (Crosslinked)</b> | <b>SD</b> |
|------------------------------------------|-----------|--------------------------------------|-----------|---------------------------------------------|-----------|-----------------------------------------|-----------|------------------------------------|-----------|--------------------------------|-----------|
| 1.7889                                   | 0.005875  | 2.1153                               | 0.004937  | 42.469                                      | 0.56841   | 66.279                                  | 1.327     | 143.0142                           | 1.06804   | 110.797                        | 1.282603  |
| 1.8621                                   | 0.00584   | 2.2854                               | 0.004671  | 50.637                                      | 0.81012   | 60.255                                  | 0.96307   | 143.2947                           | 1.311241  | 102.3203                       | 0.891267  |
| 1.8928                                   | 0.005391  | 2.4414                               | 0.004479  | 48.303                                      | 0.65922   | 46.304                                  | 0.47106   | 143.0435                           | 1.155761  | 86.91638                       | 0.390993  |
| 1.7796                                   | 0.005901  | 2.4781                               | 0.004216  | 39.188                                      | 0.47049   | 40.53                                   | 0.31737   | 141.9833                           | 0.966534  | 87.07538                       | 0.314095  |
| 1.6009                                   | 0.00445   | 2.1714                               | 0.003799  | 29.114                                      | 0.19861   | 42.276                                  | 0.31659   | 130.3349                           | 0.504816  | 119.459                        | 0.541974  |
| 1.624                                    | 0.004739  | 2.2436                               | 0.004076  | 30.071                                      | 0.22889   | 49.711                                  | 0.51078   | 135.7265                           | 0.593627  | 105.9095                       | 0.616954  |
| 1.747                                    | 0.004378  | 2.6103                               | 0.003603  | 34.417                                      | 0.26345   | 38.842                                  | 0.23372   | 136.1323                           | 0.601951  | 84.6414                        | 0.232579  |
| 1.6498                                   | 0.00507   | 2.5738                               | 0.003056  | 30.321                                      | 0.24168   | 34.13                                   | 0.14916   | 130.5271                           | 0.584045  | 82.63544                       | 0.160888  |
